# Supplementary material for: The Ability of Nuclease-Resistant RNA Aptamer against Streptococcus suis Serotype 2, Strain P1/7 to Reduce Biofilm Formation In Vitro
Source: MDPI journal article supplement (doi:10.3390/molecules27123894), 2022-06-17
Supplement: s1 [file s1]

## Supplementary Materials

**Table S1: The sequencing analysis of the RNA R8 aptamer pool.**

**GROUP 1 [7/26] [26.9 %]**

|          |                                          |
|----------|------------------------------------------|
| R8-su08  | CAUACUGAGUAAGAUCGGAAAUUUCGGUGUAAGGCCACGG |
| R8-su11  | CAUACUGAGUAAGAUCGGAAAUUUCGGUGUAAGGCCACGG |
| R8-su12  | CAUACUGAGUAAGAUCGGAAAUUUCGGUGUAAGGCCACGG |
| R8-su13  | CAUACUGAGUAAGAUCGGAAAUUUCGGUGUAAGGCCACGG |
| R8-su027 | CAUACUGAGUAAGAUCGGAAAUUUCGGUGUAAGGCCACGG |
| R8-su101 | CAUACUGAGUAAGAUCGGAAAUUUCGGUGUAAGGCCACGG |
| R8-su215 | CAUACUGAGUAAGAUCGGAAAUUUCGGUGUAAGGCCACGG |

**GROUP 2 [2/26] [7.7 %]**

|          |                                          |
|----------|------------------------------------------|
| R8-su061 | UGGAUGUAUGGAACUUGCAGAUUUAAACUGCACGAAGCGU |
| R8-su057 | UGGAUGUAUGGAACUUGCAGAUUUAAACUGCACGAAGCGU |

**Group 3 [4/26] [15.4 %]**

|          |                                         |
|----------|-----------------------------------------|
| R8-su15  | ACACGUUGCUGAAACAUAACCGAGUAACAUAAGCGGGUG |
| R8-su16  | ACACGUUGCUGAAACAUAACCGAGUAACAUAAGCGGGUG |
| R8-su007 | ACACGUUGCUGAAACAUAACCGAGUAACAUAAGCGGGUG |
| R8-su011 | ACACGUUGCUGAAACAUAACCGAGUAACAUAAGCGGGUG |

**UNGROUPED [13/26] [50 %]**

|          |                                            |
|----------|--------------------------------------------|
| R8-su014 | AAAUAGACUAUUCGGUGUAGUAGCCAGUAGAGACAUGAG    |
| R8-su037 | AAAUCAAGGGAAGAAGCCACAGUUUUUAUGCCAUCGGGGA   |
| R8-su147 | AAAUACCGAUUUCGUGCCACAUAUCUGAGAAACACUGUCGG  |
| R8-su137 | AUAUCGAGAUUCUUGUACUUGUGAUUAUGGUGUUAUGGGGUG |
| R8-su024 | CAUACUGAGAAAGAUCGGUCAAGAGUAGUGGAAUUCUGCC   |
| R8-su073 | CAUAUGGGACCGACCAUUUUACAUAUGAUAAAGCUGUACGGU |
| R8-su209 | CCACGUGAAGGAGAAAGUAACAAGGUUGUUUGUGUCGCUG   |
| R8-su068 | GUUAGUCGGUUUCUAAACAAAACGAUGUUUGAGAGGUGGCC  |
| R8-su012 | UAUGUGUACAUGCACUAUUAAACCGUACUGAUAUUCGUGUU  |
| R8-su36  | UAUUGGGUUGAUCUACAUAUGAGGUGUGACGUCGUGGAAGG  |
| R8-su025 | UUAACUGUGCAGAUUCAGUUAUUGUAGUAGAUGCCACCGG   |
| R8-su031 | UGAAACAUAACGGAGAAACAUUUUGGAGUUGAAGGUCGAUU  |
| R8-su164 | UCGGUAAUACGCCAUGUUCUUCGCUAGGAACACUAAGGG    |
